# Supplementary material for: Autocatalyzed and heterogeneously catalyzed esterification kinetics of glycolic acid with ethanol
Source: Royal Society of Chemistry journal article supplement (doi:10.1039/d1re00418b), 2021-11-18
Supplement: d1re00418b1.pdf [file d1re00418b1.pdf]

ARTICLE

## Autocatalyzed and heterogeneously catalysed esterification kinetics of glycolic acid with ethanol

Received 00th January 20xx,  
 Accepted 00th January 20xx

Laura Reyes\* <sup>a</sup>, Clémence Nikitine <sup>a</sup>, Léa Vilcoq <sup>a</sup> and Pascal Fongarland <sup>a</sup>

DOI: 10.1039/x0xx00000x

### Supplementary Information

#### HPLC quantification

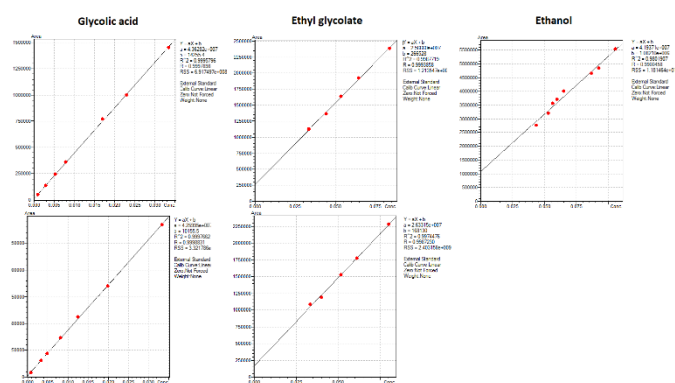

Plots of area and concentration correlations for compounds quantified by HPLC

#### Carbon balance

Table S1. Example of the carbon balance, conversion and yield for a reaction Conditions: Acid/Alcohol 1/4 [mol/mol], 1400 rpm, 75°C.

| Reaction time (min) | Carbon balance (%) | Conversion (%) | Yield (%) |
|---------------------|--------------------|----------------|-----------|
| 0                   | 0.00               | 0.00           | 0.00      |
| 10                  | -0.56              | 2.59           | 2.59      |
| 20                  | -2.44              | 6.61           | 4.98      |
| 30                  | 0.99               | 8.48           | 7.36      |
| 40                  | -5.22              | 10.38          | 10.31     |
| 50                  | -2.52              | 12.59          | 11.52     |
| 60                  | -4.93              | 14.47          | 13.82     |
| 120                 | -2.51              | 23.23          | 23.40     |
| 180                 | 0.67               | 28.69          | 28.35     |
| 240                 | -3.36              | 33.97          | 34.23     |
| 300                 | -4.89              | 40.69          | 41.87     |
| 360                 | -3.49              | 44.82          | 45.34     |

Univ Lyon, CNRS, Université Claude-Bernard Lyon 1, CPE-Lyon, CP2M ( Catalyse, Polymérisation, Procédés et Matériaux), F-69616, VILLEURBANNE, France.

\* corresponding author: Laura REYES (lrv@lgpc.cpe.fr)

Footnotes relating to the title and/or authors should appear here.

Electronic Supplementary Information (ESI) available: [details of any supplementary information available should be included here]. See DOI: 10.1039/x0xx00000x

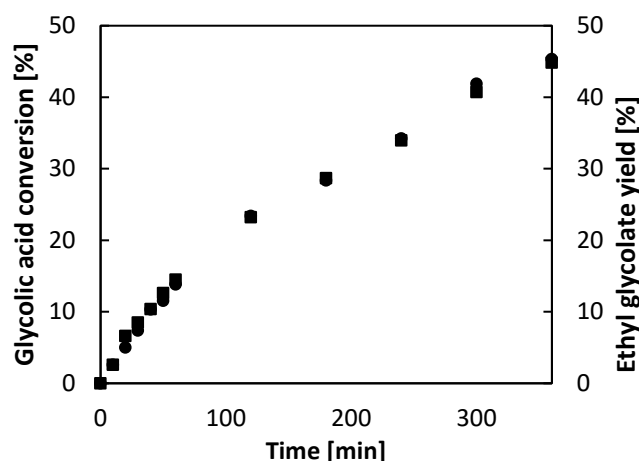

Figure S2. Example representation of glycolic acid conversion and ethyl glycolate yield Conditions: Acid/Alcohol 1/4 [mol/mol], 1400 rpm, 75°C. Yield (●); Conversion (■).

#### Reproducibility of experiments

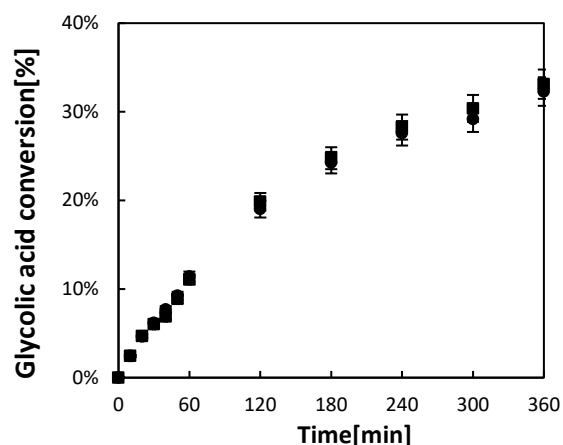

Figure S3 Test of glycolic acid esterification with ethanol. Conditions: 60°C, Acid/Alcohol 1/3 [mol/mol]. (●) test 1; (■) test 2

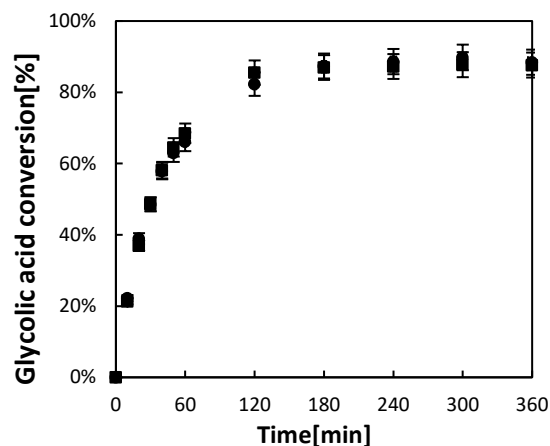

Figure S4 Test of glycolic acid esterification with ethanol. Conditions: 70°C, Acid/Alcohol 1/4 [mol/mol], Amberlyst 2 wt%. (●) test 1; (■) test 2.

### Experimental thermodynamic equilibrium

It was considered that the equilibrium was reached for all temperatures after a period of 3h of reaction

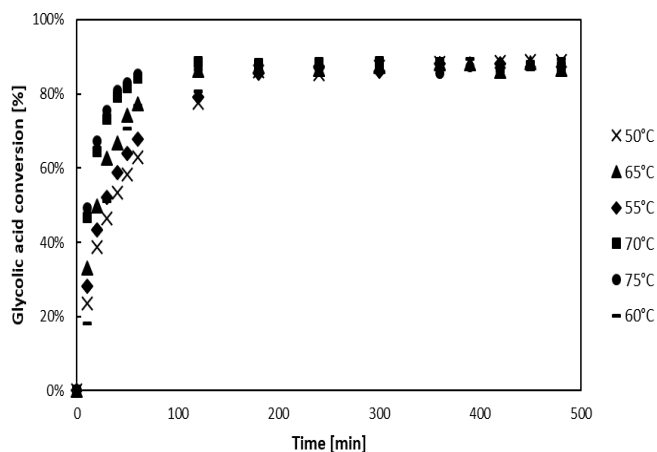

Figure S5. Experimental profiles of glycolic acid conversion in presence of sulfuric acid Conditions: Acid/Alcohol 1/4 [mol/mol], 1400 rpm, H<sub>2</sub>SO<sub>4</sub> 0.3 w%.

### Experimental fitting for autocatalyzed reactions

Table S2. Correlation coefficients matrix for pseudo homogeneous, autocatalysis promoted by solvated protons and molecular glycolic acid respectively

|        |        |
|--------|--------|
| 1      | 0.277  |
| 0.277  | 1      |
| 1      | -0.394 |
| -0.394 | 1      |
| 1      | -0.558 |
| -0.558 | 1      |

### Heterogeneously catalysts

Table S3. Main properties of the commercial heterogeneous catalysts tested

|                        | Si/Al Mole Ratio  | Surface Area [m <sup>2</sup> .g <sup>-1</sup> ] | Main pore opening [Å]  | Membered rings  |
|------------------------|-------------------|-------------------------------------------------|------------------------|-----------------|
| Faujasite <sup>1</sup> | 40.0 <sup>1</sup> | 780 <sup>1</sup>                                | 7.4 × 7.4 <sup>1</sup> | 12 <sup>1</sup> |
| Faujasite <sup>2</sup> | 2.5 <sup>2</sup>  | 730 <sup>2</sup>                                | 7.4 × 7.4 <sup>2</sup> | 12 <sup>2</sup> |
| ZSM-5 <sup>3</sup>     | 40.0 <sup>3</sup> | 425 <sup>3</sup>                                | 5.1 × 5.5 <sub>3</sub> | 10 <sup>3</sup> |
| ZSM-5 <sup>4</sup>     | 11.5 <sup>4</sup> | 425 <sup>4</sup>                                | 5.1 × 5.5 <sup>4</sup> | 10 <sup>4</sup> |
| Mordenite <sup>5</sup> | 10.0 <sup>5</sup> | 500 <sup>5</sup>                                | 6.5 × 7 <sup>5</sup>   | 12 <sup>5</sup> |

|                                | Physical form     | Surface Area [m <sup>2</sup> .g <sup>-1</sup> ] | Ave Pore diameter [Å] | Total pore vol [mL.g <sup>-1</sup> ]    |
|--------------------------------|-------------------|-------------------------------------------------|-----------------------|-----------------------------------------|
| Amberlyst 15 <sub>6</sub>      | Beads             | 53 <sup>6</sup>                                 | 300 <sup>6</sup>      | 0.4 <sup>6</sup>                        |
| Amberlyst 36 <sub>7</sub>      | Beads             | 33 <sup>7</sup>                                 | 240 <sup>7</sup>      | 0.2 <sup>7</sup>                        |
| Amberlyst 70 <sub>8</sub>      | Beads             | 36 <sup>8</sup>                                 | 220 <sup>8</sup>      | 0.15 <sup>8</sup>                       |
| Dowex 50XW8-100 <sup>9</sup>   | Powder            |                                                 | 100-200 <sup>9</sup>  | 0.33 <sup>9</sup>                       |
| Nafion NR50 <sub>10</sub>      | Beads             |                                                 |                       |                                         |
|                                | Crystalline phase | Surface Area [m <sup>2</sup> .g <sup>-1</sup> ] | Av Pore diameter [Å]  | Total pore volume [mL.g <sup>-1</sup> ] |
| TiO <sub>2</sub> <sup>11</sup> | Anatase           | 150 <sup>11</sup>                               | 140 <sup>11</sup>     | 0.388 <sup>11</sup>                     |

Table S4. Acid sites for the acid solids tested in the catalyst screening

|                  | Strong | Medium | Weak | Total | Bibliographic reference | Internal diffusion limitations                                                                                                                                                                                                                                                                                                                           |
|------------------|--------|--------|------|-------|-------------------------|----------------------------------------------------------------------------------------------------------------------------------------------------------------------------------------------------------------------------------------------------------------------------------------------------------------------------------------------------------|
|                  |        |        |      |       |                         | Procedure and equations employed for the by the Weisz-Prater Criterion                                                                                                                                                                                                                                                                                   |
| FAU 2.5/1        | 0      | 449    | 1149 | 1598  | 1900 <sup>12</sup>      | $\phi = \frac{r_{0cat} \cdot \rho_{cat} \cdot (d_p/6)^2}{D_{Eff} \cdot C_{GA}} \quad (I)$                                                                                                                                                                                                                                                                |
| MOR 10.1         | 616    | 245    | 159  | 1020  | 950 <sup>12</sup>       | With $r_{0cat}$ the observed reaction rate for the heterogeneously catalyzed reaction, $\rho_{cat}$ and $d_p$ the density and particle of diameter of the catalyst, $D_{Eff}$ the effective diffusivity of glycolic acid in the particle and $C_{GA}$ the glycolic acid molar concentration in the solution. The first term $r_{0cat}$ was calculated as |
| MFI 11.5         | 797    | 180    | 158  | 1134  | 1320 <sup>13</sup>      |                                                                                                                                                                                                                                                                                                                                                          |
| MFI 40.1         | 143    | 117    | 380  | 640   | 610 <sup>13</sup>       |                                                                                                                                                                                                                                                                                                                                                          |
| FAU 40.1         | 348    | 69     | 122  | 540   | 530 <sup>12</sup>       | $r_{0cat} = \frac{r_0}{w_{cat} \cdot \rho_{stn}} \quad (II)$                                                                                                                                                                                                                                                                                             |
| Amberlyst15      | 3995   | 0      | 0    | 3995  | 4700 <sup>6</sup>       | In which $r_0$ is the reaction rate by unit of volume of the reacting media, $w_{cat}$ the catalyst loading by mass of reacting media and $\rho_{stn}$ the density of the reacting media.                                                                                                                                                                |
| Amberlyst36      | 4890   | 0      | 0    | 4890  | 5400 <sup>7</sup>       | Considering that in the liquid phase the catalyst presents an homogeneous swelling, the particle swelled diameter was calculated by equation (III) in which $d_{pdry}$ , $V_{pdry}$ are the dry diameter and volume and $V_{pswollen}$ the swollen volume.                                                                                               |
| Amberlyst70      | 2615   | 0      | 0    | 2615  | 2650 <sup>8</sup>       |                                                                                                                                                                                                                                                                                                                                                          |
| Dowex50XW8-100   | 4218   | 0      | 0    | 4218  | 4700 <sup>9</sup>       | $d_p = d_{pdry} \sqrt[3]{\frac{V_{pswollen}}{V_{pdry}}} \quad (III)$                                                                                                                                                                                                                                                                                     |
| Nafion NR50      | 880    | 0      | 0    | 880   | 900 <sup>10</sup>       | For Amberlyst 70 the swelling ratio ( $V_{pswollen}/V_{pdry}$ ) had been reported to be between 2 <sup>43</sup> -2.34 <sup>15</sup> for short chain alcohols (C1-C4). The resin employed in this study presents an average dry diameter of 300 $\mu\text{m}$ and so the calculated swelled diameter is 398 $\mu\text{m}$ .                               |
| TiO <sub>2</sub> | 163    | 89     | 171  | 423   | 430 <sup>14</sup>       |                                                                                                                                                                                                                                                                                                                                                          |

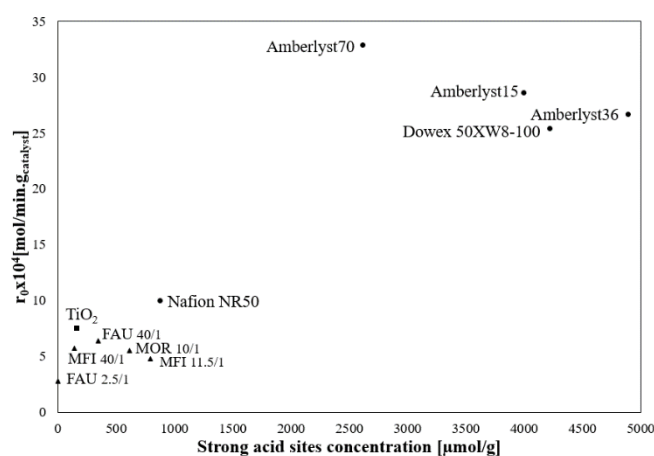

Figure S6. Influence of strong acid sites concentration over the initial reaction rate. Conditions: Acid/Alcohol 1/4 [mol/mol], 1400 rpm, 70°C, Catalyst 2% [g/g sln]. Catalyst (●) Ion exchange resin; (■) Oxide; (▲) Zeolite

$$D_{Eff} = D_{GA} \left( \frac{\varepsilon}{\tau} \right) \quad (IV)$$

Different correlations had been proposed for the evaluation of the diffusion coefficient, however the most widely employed is the Wilke-Chang equation (V).<sup>16</sup>

$$D_m = \frac{7.4 \times 10^8 T \sqrt{a_s M_s}}{\mu_s V_a^{0.6}} \quad (V)$$

In which (T) represents the temperature, ( $M_s$ ) ( $a_s$ ) ( $\mu_s$ ) the molecular weight, association coefficient and viscosity of the solvent, ethanol in this case, and  $V_a$  the molar volume at the normal boiling point. The molar volume at normal boiling point of glycolic acid in this case was calculated by group/atom contribution Le bas Method<sup>17</sup>

The estimated value for the diffusion coefficient was later multiplied by the correlation of porosity ( $\varepsilon$ ) and tortuosity ( $\tau$ ) extracted from the literature for a similar resin (Amberlyst 15) considering than latter can be approximated to the inverse of the former.<sup>18,19</sup>

$$D_{Eff} = D_{GA} \varepsilon^2 \quad (VI)$$

## Impact of acid concentration in heterogeneous tests

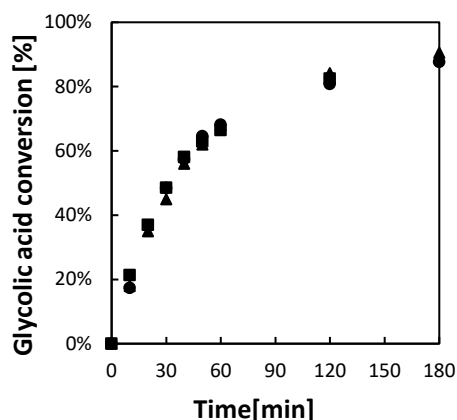

Figure S7 Influence of the concentration of glycolic acid in the initial solution over the reaction catalyzed by Amberlyst 70. Conditions: 70°C, Catalyst 2 wt%. Acid/Alcohol 1/3 [mol/mol] (●) Acid/Alcohol 1/4 [mol/mol], (■) Acid/Alcohol 1/6 [mol/mol](▲).

## Experimental fitting for reactions in presence of Amberlyst 70

Table S5. Correlation coefficients matrix for PH, ER and LH molecular glycolic acid respectively

|        |        |        |        |        |        |
|--------|--------|--------|--------|--------|--------|
| 1      |        |        |        |        |        |
| -0.762 |        |        |        |        |        |
| 1      | -0.762 |        |        |        |        |
| -0.627 | 1      |        |        |        |        |
| 0.439  | -0.753 | 1      |        |        |        |
| 0.0697 | -0.253 | 0.207  | 1      |        |        |
| 1      | -0.712 | -0.306 | 0.102  | 0.512  | -0.170 |
| -0.712 | 1      | 0.467  | 0.067  | -0.675 | 0.131  |
| -0.306 | 0.467  | 1      | -0.316 | -0.651 | -0.081 |
| 0.102  | 0.067  | -0.316 | 1      | 0.010  | 0.502  |
| 0.512  | -0.675 | -0.651 | 0.010  | 1      | -0.018 |
| -0.170 | 0.131  | -0.081 | 0.502  | -0.018 | 1      |

## References

- 1 International Zeolyst, 2014, 1–5.
- 2 ThermoFischer, *Product specification Zeolite Y hydrogen SiO<sub>2</sub>:Al<sub>2</sub>O<sub>3</sub> mole ratio 5.1:1*, 2020.
- 3 Zeolyst International, 2015, 1–6.
- 4 Zeolyst International, *Zeolite Ammonium ZSM-5 Data sheet*, 2014.
- 5 ThermoFischer, *Alfa Aesar Mordenite-Amonnioum SiO<sub>2</sub>:Al<sub>2</sub>O<sub>3</sub> mole ratio 20:1*, 1993, vol. 21.
- 6 Dupont, *Product Data Sheet AMBERLYST™*, 2019.
- 7 Dupont, *Product Data Sheet - AMBERLYST™ 36*, 2019.
- 8 Rohm & Haas, *Amberlyst 70 product data sheet*, 2005.
- 9 C. DOW, *Dowex-50-WX8-50-100-resin*, 1990, vol. 117-

01509-

- 10 FuelCellStore, *Nafion NR-40 and NR-50*, 2016, vol. 10608.
- 11 A. A. by T. F. Scientific, 44429 Titanium(IV) oxide, catalyst support, <https://www.alfa.com/fr/catalog/044429/>, (accessed 11 August 2020).
- 12 S. Pariente, N. Tanchoux and F. Fajula, *Green Chem.*, 2009, **11**, 1256–1261.
- 13 C. Engtrakul, C. Mukarakate, A. K. Starace, K. A. Magrini, A. K. Rogers and M. M. Yung, *Catal. Today*, 2016, **269**, 175–181.
- 14 C. Mutschler, Université Claude Bernard Lyon 1, 2020.
- 15 M. Á. Pérez-Maciá, R. Bringué, M. Iborra, J. Tejero and F. Cunill, *AIChE J.*, 2016, **62**, 180–194.
- 16 K. Miyabe and R. Isogai, *J. Chromatogr. A*, 2011, **1218**, 6639–6645.
- 17 A. H. A. Al-Rubaiee, College of Engineering of Nahrain University, 2009.
- 18 T. Dogu, E. Aydin, N. Boz, K. Murtezaoglu and G. Dogu, *Int. J. Chem. React. Eng.*, DOI:10.2202/1542-6580.1012.
- 19 A. Orjuela, A. J. Yanez, A. Santhanakrishnan, C. T. Lira and D. J. Miller, *Chem. Eng. J.*, 2012, **188**, 98–107.
